# Supplementary material for: Competing Demands for Time and Self-Care Behaviors, Processes of Care, and Intermediate Outcomes Among People With Diabetes: Translating Research Into Action for Diabetes (TRIAD)
Source: PubMed Central journal article supplement — Diabetes Care. 2011 Apr 20;34(5):1180–2. doi: 10.2337/dc10-2038 (PMC3114509; doi:10.2337/dc10-2038), 2011-04-20
Supplement: supp_dc10-2038v102038_DC102038SupplementaryData.pdf [file supp_dc10-2038v102038_DC102038SupplementaryData.pdf]

SUPPLEMENTARY DATA

**Supplementary Table 1. Characteristics of the included study population\* vs. the total population.**

\*Inclusion criteria: completed both baseline and followup survey and consented to medical record review at both time points.

|                                                 | Included    | Total       |
|-------------------------------------------------|-------------|-------------|
|                                                 | Mean ± SD   | Mean ± SD   |
|                                                 | or N (%)    | or N (%)    |
| N                                               | 5,478       | 11,927      |
| Age (years)                                     | 60 ± 13     | 60 ± 13     |
| Sex (male)                                      | 2,604 (48%) | 5,568 (47%) |
| Race/ethnicity                                  |             |             |
| Hispanic                                        | 705 (14%)   | 1,797 (16%) |
| Non-Hispanic Black                              | 752 (15%)   | 1,839 (17%) |
| Non-Hispanic White                              | 2,470 (48%) | 4,646 (42%) |
| Asian/Pacific Islander                          | 805 (16%)   | 1,743 (16%) |
| Other                                           | 451 (9%)    | 980 (9%)    |
| Education                                       |             |             |
| Less than high school grad                      | 1,014 (19%) | 2,679 (23%) |
| High school graduate                            | 1,578 (29%) | 3,464 (30%) |
| Some college                                    | 1,652 (31%) | 3,261 (28%) |
| ≥ College graduate                              | 1,155 (21%) | 2,118 (18%) |
| Income                                          |             |             |
| ≤ \$15,000                                      | 1,278 (26%) | 3,049 (29%) |
| \$15,000 - \$40,000                             | 1,534 (31%) | 3,289 (32%) |
| \$40,000 - \$75,000                             | 1,331 (27%) | 2,516 (24%) |
| ≥ \$75,000                                      | 848 (17%)   | 1,504 (15%) |
| Time since diabetes diagnosis (years)           | 12 ± 10     | 12 ± 10     |
| Diabetes treatment                              |             |             |
| Diet/exercise                                   | 463 (8%)    | 904 (8%)    |
| Oral medication(s)                              | 3,370 (62%) | 7,452 (62%) |
| Insulin                                         | 992 (18%)   | 2,161 (18%) |
| Insulin + oral medication(s)                    | 653 (12%)   | 1,410 (12%) |
| Competing demands                               |             |             |
| No competing demands                            | 2,417 (52%) | 3,790 (51%) |
| Caregiving only                                 | 317 (7%)    | 486 (7%)    |
| Employment responsibilities only                | 1,670 (36%) | 2,680 (36%) |
| Both caregiving and employment responsibilities | 275 (6%)    | 431 (6%)    |

SUPPLEMENTARY DATA

**Supplementary Table 2. Characteristics of the participants stratified by gender (N=5,478).**

|                                                 | Men              | Women            |
|-------------------------------------------------|------------------|------------------|
|                                                 | Mean ( $\pm$ SD) | Mean ( $\pm$ SD) |
|                                                 | or N (%)         | or N (%)         |
| N                                               | 2,604            | 2,874            |
| <b>Competing Demands/Independent Variables</b>  |                  |                  |
| Missing                                         | 290              | 509              |
| No competing demands                            | 1,146 (49%)      | 1,271 (54%)      |
| Caregiving only                                 | 111 (5%)         | 206 (9%)         |
| Employment responsibilities only                | 909 (39%)        | 761 (32%)        |
| Both caregiving and employment responsibilities | 148 (6%)         | 127 (5%)         |
| <b>Demographic Characteristics</b>              |                  |                  |
| Age (years)                                     | 61 (12)          | 60 (13)          |
| <b>Age categories</b>                           |                  |                  |
| < 45 years                                      | 289 (11%)        | 371 (13%)        |
| 45-64 years                                     | 1,346 (52%)      | 1,449 (50%)      |
| $\geq$ 65 years                                 | 969 (37%)        | 1,054 (37%)      |
| <b>Race/ethnicity</b>                           |                  |                  |
| Missing                                         | 151              | 144              |
| Hispanic                                        | 333 (14%)        | 372 (14%)        |
| Non-Hispanic Black                              | 256 (10%)        | 496 (18%)        |
| Non-Hispanic White                              | 1,239 (50%)      | 1,231 (45%)      |
| Asian/Pacific Islander                          | 408 (17%)        | 397 (15%)        |
| Other                                           | 217 (8%)         | 234 (9%)         |
| <b>Education</b>                                |                  |                  |
| Missing                                         | 40               | 39               |
| Less than high school graduate                  | 426 (17%)        | 588 (21%)        |
| High school graduate                            | 636 (25%)        | 942 (33%)        |
| Some college                                    | 800 (31%)        | 852 (30%)        |
| $\geq$ College graduate                         | 702 (27%)        | 453 (16%)        |
| <b>Income</b>                                   |                  |                  |
| Missing                                         | 183              | 304              |
| $\leq$ \$15,000                                 | 405 (17%)        | 873 (34%)        |
| \$15,000 - \$40,000                             | 697 (19%)        | 837 (33%)        |
| \$40,000 - \$75,000                             | 759 (31%)        | 572 (22%)        |
| $\geq$ \$75,000                                 | 560 (23%)        | 288 (11%)        |
| <b>Spouse employment</b>                        |                  |                  |
| Missing                                         | 52               | 55               |
| Not married                                     | 563 (22%)        | 1,400 (50%)      |
| Employed                                        | 955 (37%)        | 678 (24%)        |
| Retired                                         | 586 (23%)        | 632 (22%)        |
| Homemaker                                       | 335 (13%)        | 0                |

SUPPLEMENTARY DATA

|                                                      |             |             |
|------------------------------------------------------|-------------|-------------|
| Not employed                                         | 113 (4%)    | 109 (4%)    |
| <u>Spouse education</u>                              |             |             |
| Missing                                              | 61          | 57          |
| Not married                                          | 563 (22%)   | 1,400 (50%) |
| Less than high school graduate                       | 254 (10%)   | 281 (10%)   |
| High school graduate or some college                 | 1,242 (49%) | 842 (30%)   |
| ≥ College graduate                                   | 484 (19%)   | 294 (10%)   |
| <u>Clinical characteristics</u>                      |             |             |
| Time since diabetes diagnosis (years)                | 11 (10)     | 12 (10)     |
| Missing                                              | 123         | 128         |
| <u>Diabetes treatment</u>                            |             |             |
| Diet/exercise                                        | 236 (9%)    | 227 (8%)    |
| Oral medication(s) only                              | 1,678 (65%) | 1,692 (59%) |
| Insulin + oral medication                            | 259 (10%)   | 394 (14%)   |
| Insulin – type 1 diabetes                            | 129 (5%)    | 195 (7%)    |
| Insulin – type 2 diabetes                            | 302 (12%)   | 366 (13%)   |
| <u>Self-rated health</u>                             |             |             |
| Missing                                              | 16          | 26          |
| Excellent or very good                               | 713 (28%)   | 537 (19%)   |
| Good                                                 | 1,048 (40%) | 1,167 (41%) |
| Fair or poor                                         | 827 (42%)   | 1,144 (40%) |
| <u>Self-care behaviors</u>                           |             |             |
| <u>Physical Activity</u>                             |             |             |
| Missing                                              | 60          | 90          |
| No physical activity or only light physical activity | 1,317 (52%) | 1,591 (57%) |
| Vigorous at least 1-2 times/week                     | 1,227 (48%) | 1,193 (43%) |
| <u>Daily foot self-care performed</u>                |             |             |
| Missing                                              | 291         | 274         |
| <u>Self-monitoring blood glucose</u>                 |             |             |
| <u>Oral medication users</u>                         |             |             |
| Missing                                              | 45          | 37          |
| <6 time/week or <1/day                               | 1,012 (62%) | 873 (53%)   |
| At least 6-7 times/week and 1/day                    | 621 (38%)   | 782 (47%)   |
| <u>Insulin users</u>                                 |             |             |
| Missing                                              | 10          | 10          |
| <6 time/week or <1/day                               | 210 (31%)   | 259 (27%)   |
| At least 6-7 times/week and 1/day                    | 470 (69%)   | 686 (73%)   |
| <u>Processes of care</u>                             |             |             |
| Aspirin advised or taking aspirin                    | 1,737 (67%) | 1,823 (63%) |
| Dilated eye exam performed                           | 2,016 (77%) | 2,285 (80%) |
| Foot exam performed                                  | 2,212 (85%) | 2,442 (85%) |
| Glycemic control assessed                            | 2,236 (86%) | 2,469 (86%) |
| Influenza immunization                               | 1,838 (71%) | 2,049 (72%) |

SUPPLEMENTARY DATA

|                                |             |             |
|--------------------------------|-------------|-------------|
| Missing                        | 17          | 12          |
| LDL-cholesterol assessed       | 1,983 (76%) | 2,115 (74%) |
| Proteinuria assessed           | 2,129 (82%) | 2,359 (82%) |
|                                |             |             |
| <u>Intermediate outcomes</u>   |             |             |
| A1C (%)                        | 7.8 ± 1.7   | 7.9 ± 1.6   |
| Missing                        | 187         | 212         |
| Systolic blood pressure (mmHg) | 135 ± 18    | 137 ± 19    |
| Missing                        | 258         | 213         |
| LDL-cholesterol (mg/dl)        | 107 ± 32    | 113 ± 35    |
| Missing                        | 388         | 463         |
